# Supplementary material for: Revealing the contributions of DFT to the spectral interpretation for an amino benzoyl thiourea derivative: Insights into experimental studies from theoretical perspectives, and biological evaluation
Source: Royal Society of Chemistry journal article supplement (doi:10.1039/d3nj02781c), 2023-01-01
Supplement: d3nj02781c1.pdf [file d3nj02781c1.pdf]

## Supplementary data

### *Revealing the contributions of DFT to the spectral interpretation for amino benzoyl thiourea derivative: Insights into experimental studies from theoretical perspectives, and biological evaluation*

*Ahmed M. Hegazy<sup>a</sup>, Nesreen S. Haiba<sup>b</sup>, Mohamed K. Awad<sup>c\*</sup>, Mohamed Teleb<sup>d</sup>, and Faten M. Atlam<sup>c</sup>*

<sup>a</sup> Department of Materials Science, Institute of Graduate Studies and Research, Alexandria University, Egypt.

<sup>b</sup> Department of Chemistry and Physics, Faculty of Education, Alexandria University, Egypt.

<sup>c</sup> Theoretical Applied Chemistry Unit (TACU), Chemistry Department, Faculty of Science, Tanta University, Egypt.

<sup>d</sup> Department of Pharmaceutical Chemistry, Faculty of Pharmacy, Alexandria University, Alexandria, 21521, Egypt

**Corresponding author** [mohamed.awad1@science.tanta.edu.eg](mailto:mohamed.awad1@science.tanta.edu.eg)

## Table of content

### 1. Quantum chemical data for APCB

| Table number  | Table caption                                                                                                                       | Page |
|---------------|-------------------------------------------------------------------------------------------------------------------------------------|------|
| S1            | Optimized structural parameters (bond length, bond angle and dihedral angle) of 2-amino- <i>N</i> -(phenylcarbamothioyl) benzamide. | 3    |
| S2            | Calculated and experimental vibrational frequencies for the title molecule                                                          | 5    |
| S3            | Global reactivity descriptors for APCB in the gas phase, THF and DMSO solvents.                                                     | 8    |
| S4            | Calculated thermodynamic functions as a function of temperature.                                                                    | 9    |
| S5            | The computed NLO parameters for APCB.                                                                                               | 10   |
| S6            | Calculated values for the condensed Fukui functions.                                                                                | 11   |
| S7            | Calculated drug-likeness properties for the APCB compound.                                                                          | 12   |
| S8            | Inhibition of VEGFR-2 Enzyme in the presence of various concentrations of APCB.                                                     | 18   |
| S9            | Inhibition of VEGFR-2 Enzyme in the presence of various concentrations of sorafenib.                                                | 1    |
| S10           | Comparison of IC <sub>50</sub> of the investigated compound to other recently published thiourea derivative and reference compound. | 19   |
| Figure number | Figure caption                                                                                                                      | Page |
| S1            | PXRD data for an investigated compound.                                                                                             | 7    |
| S2            | Charge distribution density in HOMO and LUMO for APCB in gas phase, THF and DMSO solvents.                                          | 8    |
| S3            | Graphs depicting the temperature dependency of entropy, heat capacity, and enthalpy for APCB molecule.                              | 9    |
| S4            | Calculated $f_k^+$ , $f_k^-$ , and $\Delta f_k$ for different atoms in APCB.                                                        | 10   |
| S5            | The calculated natural charges for different atoms in APCB.                                                                         | 11   |
| S6            | The bioavailability of the investigated compound tested using the swissADME web application.                                        | 12   |
| S7            | Relation between VEGFR-2 enzyme inhibition as a function of concentration for (a) head molecule. (b) sorafenib.                     | 17   |

### 2. The procedure of calculation for reduced density gradient

### 3. Biological evaluations

**Table S1** Optimized structural parameters (bond length, bond angle and dihedral angle) of 2-amino-*N*-(phenylcarbamothioyl) benzamide.

| Bonded atoms | Bond Length (Å) | Bonded atoms | Bond angle (°) | Bonded atoms | Bond angle (°) |
|--------------|-----------------|--------------|----------------|--------------|----------------|
| C1-C2        | 1.409           | C2,C1,C6     | 118.667        | C18,N19,H21  | 112.818        |
| C2-C3        | 1.381           | C2,C1,C14    | 121.420        | C18,N19,C22  | 132.497        |
| C3-C4        | 1.401           | C1,C2,C3     | 122.219        | H21,N19,C22  | 114.673        |
| C5-C6        | 1.413           | C6,C1,C14    | 119.902        | N19,C22,C23  | 115.257        |
| C1-C6        | 1.426           | C1,C6,C5     | 118.133        | N19,C22,C24  | 125.443        |
| C2-H7        | 1.084           | C1,C6,N11    | 122.580        | C23,C22,C24  | 119.298        |
| C3-H8        | 1.082           | C1,C14,O15   | 122.737        | C22,C23,C25  | 120.602        |
| C4-H9        | 1.084           | C1,C14,N16   | 116.331        | C22,C23,H26  | 119.475        |
| C5-H10       | 1.085           | C3,C2,H7     | 118.002        | C22,C24,C27  | 119.414        |
| C6-N11       | 1.366           | C2,C3,C4     | 118.795        | C22,C24,H32  | 119.951        |
| N11-H12      | 1.009           | C2,C3,H8     | 120.413        | C25,C23,H26  | 119.922        |
| N11-H13      | 1.006           | C4,C3,H8     | 120.788        | C23,C25,C28  | 120.208        |
| C1-C14       | 1.479           | C3,C4,C5     | 120.606        | C23,C25,H29  | 119.455        |
| C14-C15      | 1.240           | C3,C4,H9     | 120.009        | C27,C24,H32  | 120.633        |
| C14-N16      | 1.382           | C5,C4,H9     | 119.380        | C24,C27,C28  | 121.321        |
| N16-H17      | 1.008           | C4,C5,C6     | 121.532        | C24,C27,H30  | 118.716        |
| N16-C18      | 1.411           | C4,C5,H10    | 120.034        | C28,C25,H29  | 120.335        |
| C18-S20      | 1.673           | C6,C5,H10    | 118.432        | C25,C28,C27  | 119.155        |
| C18-N19      | 1.346           | C5,C6,N11    | 119.248        | C25,C28,H31  | 120.369        |
| N19-H21      | 1.023           | C6,N11,H12   | 117.947        | C28,C27,H30  | 119.962        |
| N19-C22      | 1.412           | C6,N11,H13   | 118.429        | C27,C28,H31  | 120.474        |
| C23-C25      | 1.387           | N11,H12,O15  | 128.141        | C18,N19,H21  | 112.818        |
| C27-C28      | 1.391           | C14,O15,H12  | 104.444        | H21,N19,C22  | 114.673        |
| C22-C24      | 1.399           | C14,N16,H17  | 118.206        | N19,C22,C23  | 115.257        |
| C24-H32      | 1.078           | C14,N16,C18  | 130.807        | N19,C22,C24  | 125.443        |
| C27-H30      | 1.084           | H17,N16,C18  | 110.958        | C23,C22,C24  | 119.298        |
| C28-H31      | 1.083           | N16,C18,N19  | 114.107        |              |                |
| C25-H29      | 1.084           | C16,C18,S20  | 116.307        |              |                |
| C23-H26      | 1.085           | N19,C18,S20  | 129.584        |              |                |

**Table S1 continued.**

| <b>Atoms</b>    | <b>Dihedral angle (°)</b> |
|-----------------|---------------------------|
| C4,C3,C2,C1     | -0.178                    |
| C5,C4,C3,C2     | 1.063                     |
| C6,C5,C4,C3     | -0.120                    |
| H7,C2,C1,C6     | 175.985                   |
| H8,C3,C2,C1     | 179.276                   |
| H9,C4,C3,C2     | -179.638                  |
| H10,C5,C4,C3    | 179.383                   |
| N11,C6,C5,C4    | -179.477                  |
| H12,N11,C6,C5   | -165.909                  |
| H13,H11,C6,C5   | -10.993                   |
| C14,C1,C2,C3    | 179.514                   |
| O15,C14,C1,C2   | 160.880                   |
| N16,C14,C1,C2   | -19.767                   |
| H17,N16,C14,C1  | 6.506                     |
| C18,N16,C14,C1  | 175.607                   |
| N19,C18,N16,C14 | 0.938                     |
| S20,C18,N16,C14 | -179.191                  |
| H21,N19,C18,N16 | 1.946                     |
| C22,N19,C18,N16 | -179.355                  |
| C23,C22,N19,C18 | -177.179                  |
| C24,C22,N19,C18 | 3.165                     |
| C25,C23,C22,N19 | -179.858                  |
| H26,C23,C22,N19 | 0.173                     |
| C27,C24,C22,N19 | 179.795                   |
| C28,C27,C24,C22 | -0.015                    |
| H29,C25,C23,C22 | -179.933                  |
| H30,C27,C24,C22 | 179.955                   |
| H31,C28,C27,C24 | 179.932                   |
| H32,C24,C22,N19 | -0.412                    |

**Table S2** Calculated and experimental vibrational frequencies for the title molecule

| Mode | Experimental Frequency | Calculated Frequency |        | IR Intensity | Assignments and PED% contributions                                                                              |
|------|------------------------|----------------------|--------|--------------|-----------------------------------------------------------------------------------------------------------------|
|      | FT-IR                  | unscaled             | scaled |              |                                                                                                                 |
| 90   |                        | 3699                 | 3551   | 89.69        | $\gamma$ NH (94)                                                                                                |
| 89   | 3250                   | 3620                 | 3475   | 39.15        | $\gamma$ NH (100)                                                                                               |
| 88   | 3220                   | 3557                 | 3415   | 88.69        | $\gamma$ NH (94)                                                                                                |
| 87   | 3140                   | 3354                 | 3219   | 369.18       | $\gamma$ NH (99)                                                                                                |
| 86   |                        | 3237                 | 3107   | 9.71         | $\gamma$ CH (98)                                                                                                |
| 85   |                        | 3200                 | 3072   | 8.37         | $\gamma$ CH (79) + $\gamma$ CH (11)                                                                             |
| 84   |                        | 3191                 | 3064   | 20.32        | $\gamma$ CH (83)                                                                                                |
| 83   |                        | 3182                 | 3052   | 19.49        | $\gamma$ CH (15) + $\gamma$ CH (65) + $\gamma$ CH (16)                                                          |
| 82   |                        | 3179                 | 3052   | 18.01        | $\gamma$ CH (86)                                                                                                |
| 81   |                        | 3173                 | 3046   | 0.42         | $\gamma$ CH (75) + $\gamma$ CH (15)                                                                             |
| 80   |                        | 3169                 | 3042   | 0.72         | $\gamma$ CH (81) + $\gamma$ CH (10)                                                                             |
| 79   |                        | 3160                 | 3033   | 8.85         | $\gamma$ CH (20) + $\gamma$ CH (77)                                                                             |
| 78   | 3026                   | 3159                 | 3032   | 5.41         | $\gamma$ CH (84)                                                                                                |
| 77   | 1665                   | 1693                 | 1627   | 52.33        | $\gamma$ CO (36) + $\beta$ HNH (28)                                                                             |
| 76   | 1620                   | 1658                 | 1593   | 337.60       | $\gamma$ CC (12) + $\gamma$ CC (10) + $\gamma$ CC (10) + $\gamma$ CC (20) + $\beta$ HNH (10) + $\beta$ HCC (11) |
| 75   |                        | 1645                 | 1581   | 36.99        | $\gamma$ CC (36) + $\beta$ HCC (10)                                                                             |
| 74   | 1553                   | 1637                 | 1573   | 217.92       | $\gamma$ CC (30) + $\beta$ HNC (11)                                                                             |
| 73   | 1531                   | 1621                 | 1558   | 153.06       | $\beta$ HNH (37)                                                                                                |
| 72   |                        | 1604                 | 1542   | 264.07       | $\gamma$ CC (20) + $\beta$ HNC (20)                                                                             |
| 71   |                        | 1585                 | 1523   | 277.46       | $\gamma$ CC (23)                                                                                                |
| 70   | 1490                   | 1551                 | 1490   | 625.99       | $\gamma$ CN (13) + $\beta$ HNC (54)                                                                             |
| 69   | 1337                   | 1526                 | 1466   | 114.64       | $\beta$ HCC (54) + $\beta$ CCC (10)                                                                             |
| 68   |                        | 1516                 | 1457   | 11.58        | $\beta$ HCC (41) + $\beta$ HCC (10)                                                                             |
| 67   |                        | 1480                 | 1422   | 19.35        | $\gamma$ CC (12) + $\beta$ HCC (17) + $\beta$ HCC (19)                                                          |
| 66   |                        | 1478                 | 1420   | 14.00        | $\gamma$ CC (10) + $\beta$ HCC (15) + $\beta$ HCC (18)                                                          |
| 65   |                        | 1383                 | 1329   | 499.52       | $\gamma$ CN (35)                                                                                                |
| 64   |                        | 1371                 | 1317   | 97.17        | $\gamma$ CC (16) + $\gamma$ CC (19) + $\gamma$ CC (10) + $\gamma$ CC (12)                                       |
| 63   |                        | 1358                 | 1305   | 63.14        | $\beta$ HCC (75)                                                                                                |
| 62   |                        | 1350                 | 1298   | 71.85        | $\beta$ HCC (42)                                                                                                |
| 61   |                        | 1342                 | 1289   | 12.14        | $\gamma$ CC (54)                                                                                                |
| 60   |                        | 1300                 | 1249   | 39.68        | $\gamma$ CC (37) + $\beta$ HCC (10)                                                                             |
| 59   |                        | 1269                 | 1219   | 284.71       | $\gamma$ CN (17)                                                                                                |
| 58   | 1225                   | 1239                 | 1190   | 69.81        | $\gamma$ CN (12) + $\gamma$ CN (16) + $\gamma$ CC (19)                                                          |
| 57   | 1193                   | 1205                 | 1158   | 0.73         | $\gamma$ CC (15) + $\beta$ HCC (75)                                                                             |
| 56   | 1168                   | 1195                 | 1148   | 78.69        | $\gamma$ CC (16) + $\beta$ HNC (58)                                                                             |
| 55   | 1122                   | 1186                 | 1140   | 5.46         | $\gamma$ CC (12) + $\beta$ HCC (47)                                                                             |
| 54   | 1069                   | 1183                 | 1137   | 0.23         | $\beta$ HCC (82)                                                                                                |
| 53   |                        | 1155                 | 1110   | 334.25       | $\gamma$ CN (42) + $\beta$ HNC (10)                                                                             |

|    |      |      |      |        |                                                                                                |
|----|------|------|------|--------|------------------------------------------------------------------------------------------------|
| 52 |      | 1110 | 1067 | 0.64   | $\gamma_{CC} (24) + \beta_{HCC} (42)$                                                          |
| 51 |      | 1085 | 1043 | 15.46  | $\gamma_{CC} (14) + \gamma_{CC} (23) + \beta_{HNC} (20) + \beta_{HCC} (12)$                    |
| 50 |      | 1072 | 1031 | 10.41  | $\gamma_{CN} (25) + \beta_{HCC} (14)$                                                          |
| 49 |      | 1051 | 1010 | 9.36   | $\gamma_{CC} (41) + \beta_{HCC} (23) + \beta_{CCC} (20)$                                       |
| 48 | 1031 | 1042 | 1001 | 16.25  | $\gamma_{CC} (12) + \gamma_{CC} (17) + \gamma_{CC} (17) + \beta_{HNC} (24) + \beta_{CCC} (12)$ |
| 47 | 987  | 1013 | 974  | 0.31   | $\gamma_{CC} (15) + \beta_{CCC} (49)$                                                          |
| 46 | 909  | 997  | 959  | 0.19   | $\tau_{HCCC} (59) + \tau_{NCCC} (13)$                                                          |
| 45 |      | 988  | 950  | 0.15   | $\tau_{HCCC} (77) + \tau_{CCCC} (11)$                                                          |
| 44 |      | 978  | 940  | 0.03   | $\tau_{HCCC} (72)$                                                                             |
| 43 |      | 965  | 927  | 3.24   | $\gamma_{CN} (11) + \beta_{CCC} (26) + \tau_{HCCC} (12)$                                       |
| 42 | 885  | 952  | 915  | 0.41   | $\tau_{HCCC} (58)$                                                                             |
| 41 |      | 919  | 883  | 7.79   | $\tau_{HCCC} (82)$                                                                             |
| 40 |      | 882  | 847  | 13.16  | $\beta_{CCC} (10) + \beta_{CNC} (20)$                                                          |
| 39 |      | 857  | 824  | 7.83   | $\tau_{HCCN} (63) + \tau_{HCCC} (13)$                                                          |
| 38 | 843  | 849  | 816  | 14.64  | $\tau_{HNCC} (25) + \tau_{HCCC} (66)$                                                          |
| 37 |      | 827  | 794  | 3.61   | $\beta_{CCC} (12) + \beta_{CCC} (10) + \beta_{CCC} (26)$                                       |
| 36 |      | 821  | 789  | 41.63  | $\tau_{HNCC} (53) + \tau_{HCCC} (24)$                                                          |
| 35 | 801  | 789  | 758  | 18.16  | $\tau_{OCNC} (42) + \tau_{NCCC} (11)$                                                          |
| 34 |      | 769  | 739  | 34.05  | $\tau_{HCCC} (60) + \tau_{CCCC} (23)$                                                          |
| 33 |      | 759  | 729  | 44.08  | $\tau_{HCCC} (49) + \tau_{HCCC} (12) + \tau_{NCCC} (10)$                                       |
| 32 | 761  | 753  | 724  | 43.69  | $\gamma_{CS} (33)$                                                                             |
| 31 |      | 707  | 679  | 1.83   | $\tau_{OCNC} (32) + \tau_{NCCC} (15)$                                                          |
| 30 | 689  | 702  | 675  | 30.59  | $\tau_{HCCC} (16) + \tau_{HCCC} (27) + \tau_{CCCC} (43)$                                       |
| 29 |      | 688  | 662  | 27.06  | $\beta_{HCC} (43) + \beta_{CCC} (10)$                                                          |
| 28 | 645  | 665  | 639  | 21.05  | $\beta_{NCS} (61)$                                                                             |
| 27 |      | 639  | 614  | 45.55  | $\beta_{HCC} (82)$                                                                             |
| 26 |      | 629  | 605  | 1.14   | $\beta_{CCC} (51) + \beta_{CCC} (24)$                                                          |
| 25 |      | 602  | 578  | 17.84  | $\tau_{SNNC} (85)$                                                                             |
| 24 | 569  | 582  | 559  | 20.60  | $\tau_{HNCC} (64)$                                                                             |
| 23 | 558  | 573  | 551  | 8.45   | $\gamma_{CC} (12) + \beta_{CCC} (12) + \beta_{CCC} (23)$                                       |
| 22 | 528  | 540  | 519  | 24.78  | $\tau_{NCCC} (17)$                                                                             |
| 21 |      | 526  | 506  | 28.79  | $\tau_{NCCC} (16)$                                                                             |
| 20 |      | 517  | 497  | 9.95   | $\tau_{HCCC} (11) + \tau_{NCCC} (67)$                                                          |
| 19 |      | 454  | 437  | 3.16   | $\beta_{CCC} (26) + \tau_{CCCC} (10)$                                                          |
| 18 |      | 438  | 421  | 7.52   | $\beta_{CCC} (38) + \tau_{CCCC} (11)$                                                          |
| 17 |      | 419  | 403  | 3.62   | $\gamma_{CC} (14) + \beta_{CCC} (45)$                                                          |
| 16 |      | 416  | 400  | 0.04   | $\tau_{HCCC} (14) + \tau_{CCCC} (81)$                                                          |
| 15 |      | 394  | 379  | 14.89  | $\beta_{CCN} (46)$                                                                             |
| 14 |      | 346  | 332  | 181.29 | $\tau_{HNCC} (74)$                                                                             |
| 13 |      | 318  | 306  | 2.96   | $\beta_{CCN} (46)$                                                                             |
| 12 |      | 271  | 260  | 1.46   | $\tau_{CNCN} (45) + \tau_{CNCN} (12)$                                                          |
| 11 |      | 249  | 240  | 6.24   | $\beta_{NCS} (47) + \tau_{CCCC} (10)$                                                          |
| 10 |      | 239  | 229  | 5.97   | $\beta_{NCS} (13) + \tau_{CCCC} (23) + \tau_{CCCC} (13) + \tau_{CNCN} (10)$                    |
| 9  |      | 199  | 191  | 6.93   | $\beta_{CCC} (13) + \beta_{CCN} (15) + \beta_{CCN} (12)$                                       |
| 8  |      | 171  | 164  | 0.97   | $\beta_{CCN} (45) + \tau_{HCCC} (14)$                                                          |

|   |  |     |     |      |                                                                                      |
|---|--|-----|-----|------|--------------------------------------------------------------------------------------|
| 7 |  | 130 | 125 | 1.77 | $\beta_{CCN}$ (21) + $\tau_{HCCC}$ (12)<br>+ $\tau_{CCCC}$ (11) + $\tau_{CCCC}$ (18) |
| 6 |  | 115 | 110 | 2.02 | $\tau_{CCCC}$ (14) + $\tau_{CNCN}$ (52)                                              |
| 5 |  | 87  | 83  | 0.94 | $\tau_{CNCN}$ (59)                                                                   |
| 4 |  | 65  | 63  | 0.68 | $\beta_{CCN}$ (70)                                                                   |
| 3 |  | 37  | 36  | 0.32 | $\tau_{CCCN}$ (76)                                                                   |
| 2 |  | 24  | 23  | 0.56 | $\tau_{CCNC}$ (76)                                                                   |
| 1 |  | 19  | 18  | 0.23 | $\tau_{CNCC}$ (86)                                                                   |

Abbreviations:  $\gamma$ -stretching,  $\beta$ - bending, and  $\tau$ -torsion modes.

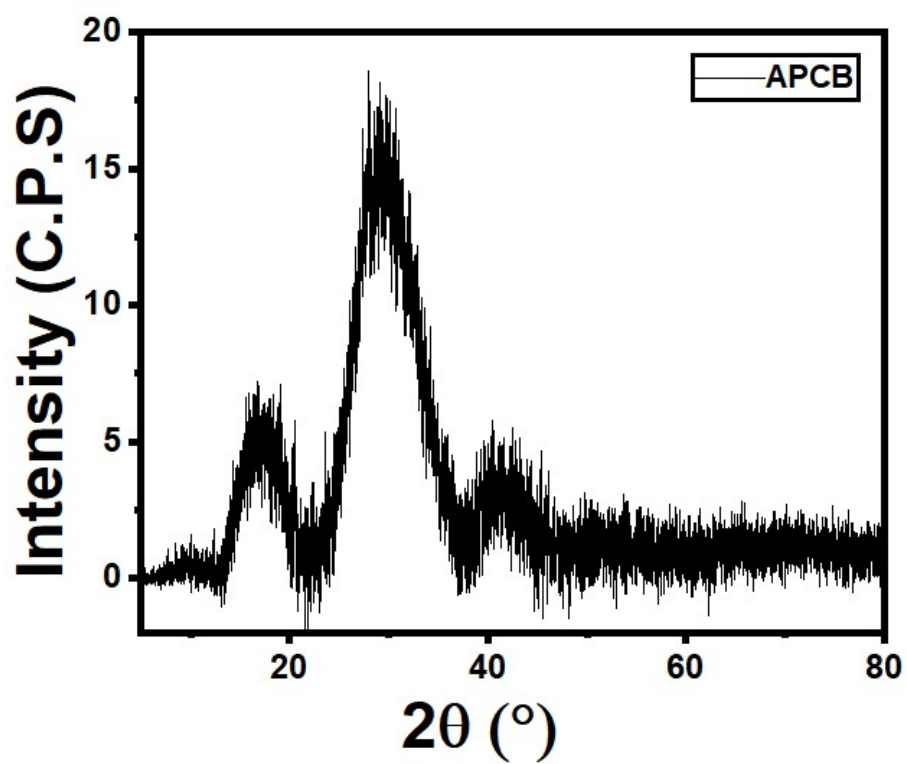

Fig.S1 PXR D data for investigated compound.

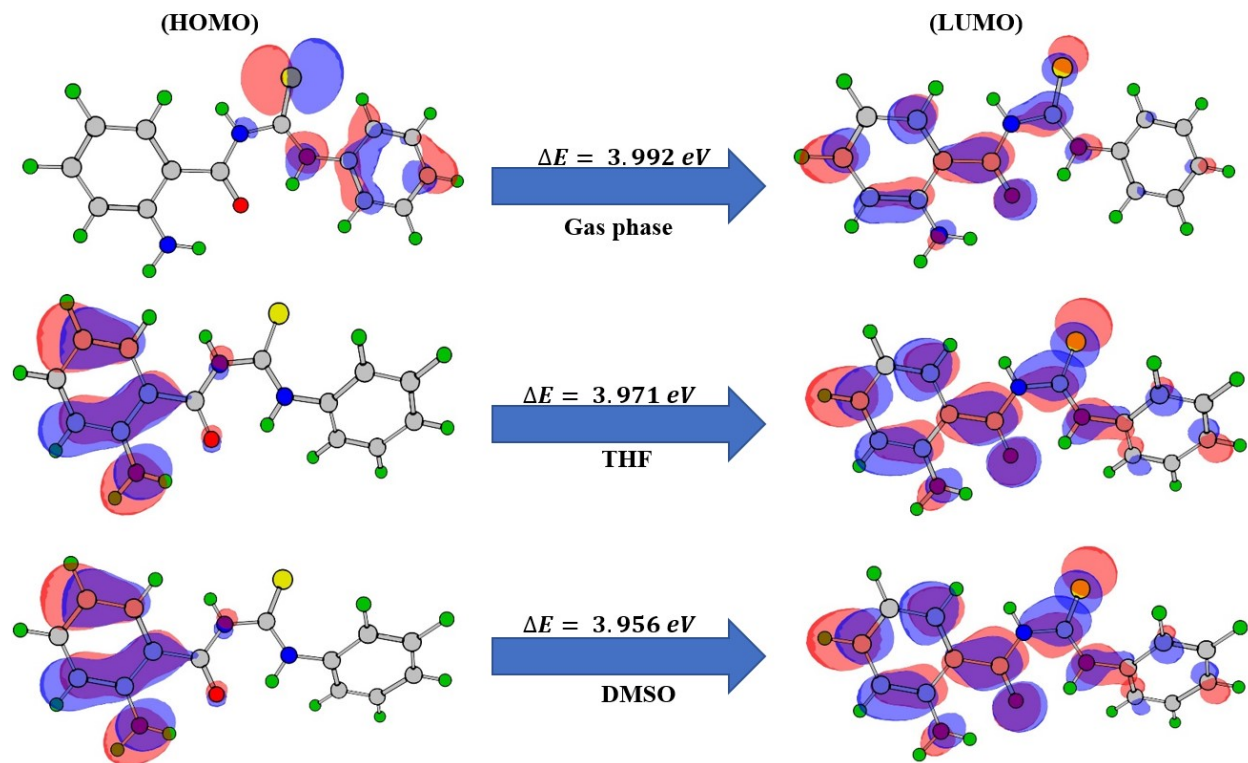

**Fig. S2** Charge distribution density in HOMO and LUMO for APCB in gas phase, THF and DMSO solvents.

**Table S3** Global reactivity descriptors for APCB in the gas phase, THF and DMSO solvents.

| Molecular descriptor                                                  | Gas phase | THF     | DMSO    |
|-----------------------------------------------------------------------|-----------|---------|---------|
| $E_{\text{HOMO}}$ (eV)                                                | -6.163    | -6.147  | -6.138  |
| $E_{\text{LUMO}}$ (eV)                                                | -2.171    | -2.176  | -2.182  |
| $\Delta E$ (eV)                                                       | 3.992     | 3.971   | 3.956   |
| Ionization potential ( $I = -E_{\text{HOMO}}$ ) (eV)                  | 6.163     | 6.147   | 6.138   |
| Electron affinity ( $A = -E_{\text{LUMO}}$ ) (eV)                     | 2.171     | 2.176   | 2.182   |
| Chemical hardness ( $\eta = (I - A)/2$ ) (eV)                         | 1.996     | 1.985   | 1.978   |
| Chemical softness ( $\sigma = 1/\eta$ ) (eV) <sup>-1</sup>            | 0.501     | 0.503   | 0.505   |
| Absolute electronegativity ( $\chi = (I + A)/2$ ) (eV)                | 4.167     | 4.161   | 4.160   |
| Chemical potential ( $\mu = -(I + A)/2$ ) (eV)                        | -4.167    | -4.161  | -4.160  |
| Electrophilicity index ( $\omega = \mu^2/\eta$ ) (eV)                 | 8.699     | 8.722   | 8.749   |
| Maximum charge transfer index ( $\Delta N_{\text{max}} = -\mu/\eta$ ) | 2.087     | 2.096   | 2.103   |
| $\mu_o$ (D)                                                           | 4.775     | 6.403   | 6.827   |
| $\langle \alpha \rangle$ (au)                                         | 236.689   | 301.647 | 318.118 |



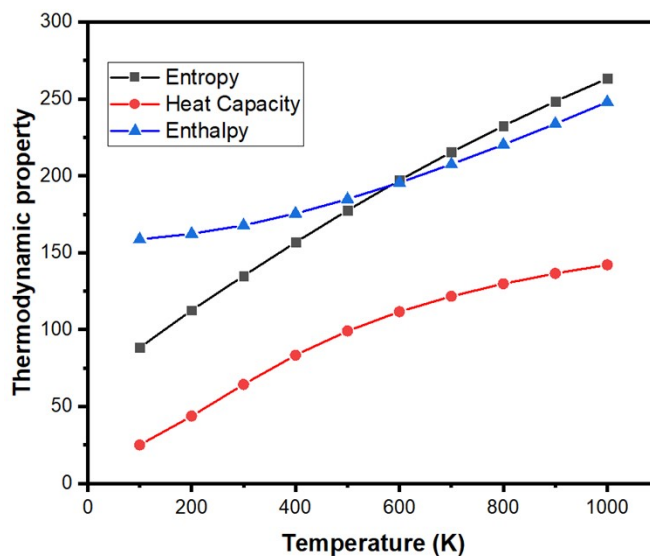

**Fig. S3** Graphs depicting the temperature dependency of entropy, heat capacity, and enthalpy for APCB molecule.

**Table S4** Calculated thermodynamic functions as a function of temperature.

| T (K) | S (Cal.mol <sup>-1</sup> .K <sup>-1</sup> ) | C <sub>v</sub> (Cal.mol <sup>-1</sup> .K <sup>-1</sup> ) | ΔH (kcal.mol <sup>-1</sup> ) |
|-------|---------------------------------------------|----------------------------------------------------------|------------------------------|
| 100   | 88.340                                      | 24.956                                                   | 158.723                      |
| 200   | 112.558                                     | 43.705                                                   | 162.326                      |
| 300   | 134.991                                     | 64.360                                                   | 167.883                      |
| 400   | 156.756                                     | 83.357                                                   | 175.543                      |
| 500   | 177.550                                     | 99.099                                                   | 184.898                      |
| 600   | 197.144                                     | 111.658                                                  | 195.667                      |
| 700   | 215.437                                     | 121.686                                                  | 207.560                      |
| 800   | 232.495                                     | 129.824                                                  | 220.350                      |
| 900   | 248.418                                     | 136.547                                                  | 233.887                      |
| 1000  | 263.325                                     | 142.184                                                  | 248.039                      |

Table S5 The computed NLO parameters for APCB.

| Descriptor       | DFT/B3LYP/<br>6-311++G(d,p) | Descriptor      | DFT/B3LYP/<br>6-311++G(d,p) |
|------------------|-----------------------------|-----------------|-----------------------------|
| $\mu_x$          | -3.415                      | $\beta_{xxx}$   | -55.603                     |
| $\mu_y$          | -3.309                      | $\beta_{xyy}$   | -36.008                     |
| $\mu_z$          | 0.429                       | $\beta_{xzz}$   | -4.939                      |
| $\mu_o$ (D)      | 4.775                       | $\beta_{yyy}$   | -66.526                     |
| $\alpha_{xx}$    | 344.642                     | $\beta_{xxy}$   | -34.766                     |
| $\alpha_{xy}$    | -1.512                      | $\beta_{yzz}$   | -0.801                      |
| $\alpha_{xz}$    | 0.656                       | $\beta_{zzz}$   | -1.296                      |
| $\alpha_{yy}$    | 248.197                     | $\beta_{xxz}$   | 4.048                       |
| $\alpha_{yz}$    | 2.433                       | $\beta_{yyz}$   | 2.409                       |
| $\alpha_{zz}$    | 117.228                     | $\beta_o$ (esu) | $1.214 \times 10^{-30}$     |
| $\alpha_o$ (esu) | $3.507 \times 10^{-23}$     |                 |                             |

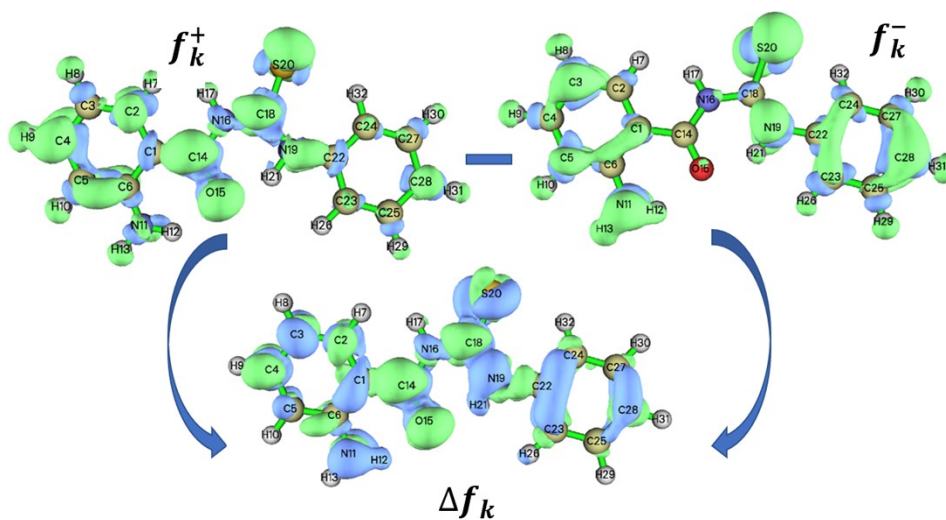

Fig. S4 Calculated  $f_k^+$ ,  $f_k^-$ , and  $\Delta f_k$  for different atoms in APCB.

**Table S6** Calculated values for the condensed Fukui functions.

| Atom | $f_k^+$ | $f_k^-$ | $\Delta f_k$ |
|------|---------|---------|--------------|
| C1   | 0.0059  | -0.0183 | 0.0242       |
| C2   | -0.0470 | -0.0192 | -0.0277      |
| C3   | -0.0023 | -0.0431 | 0.0407       |
| C4   | -0.0570 | 0.0031  | -0.0611      |
| C5   | -0.0454 | -0.0369 | -0.0084      |
| C6   | -0.0143 | -0.0009 | -0.0134      |
| N11  | -0.0248 | -0.0755 | 0.0506       |
| C14  | -0.0560 | -0.0021 | -0.0538      |
| O15  | -0.1011 | -0.0219 | -0.0791      |
| N16  | -0.0022 | -0.0089 | 0.0066       |
| C18  | 0.0144  | 0.0076  | 0.0068       |
| N19  | -0.0149 | -0.0538 | 0.0388       |
| S20  | -0.2027 | -0.1748 | -0.0278      |
| C22  | -0.0156 | -0.0674 | 0.0517       |
| C23  | -0.0389 | -0.0370 | -0.0019      |
| C24  | 0.0224  | 0.0226  | -0.0001      |
| C25  | 0.0082  | -0.0007 | 0.0090       |
| C27  | -0.0116 | -0.0029 | -0.0087      |
| C28  | -0.0286 | -0.0406 | 0.0120       |

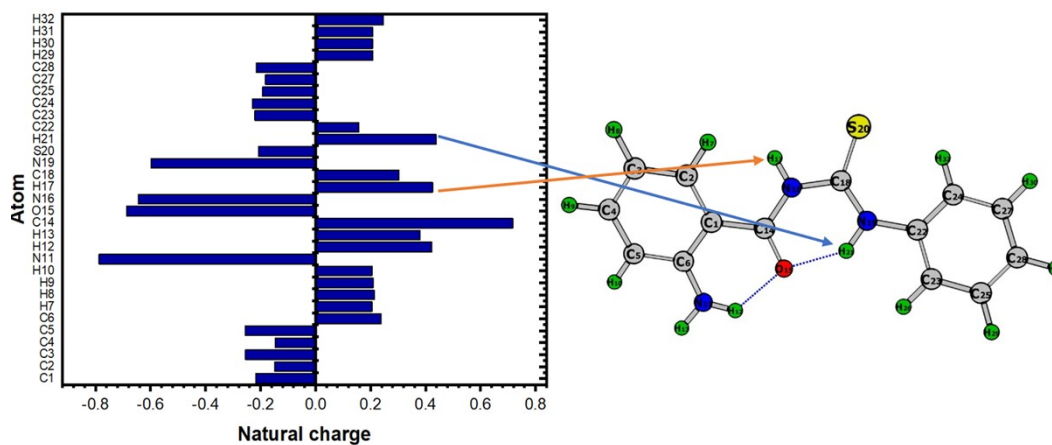

**Fig. S5** The calculated natural charges for different atoms in APCB.

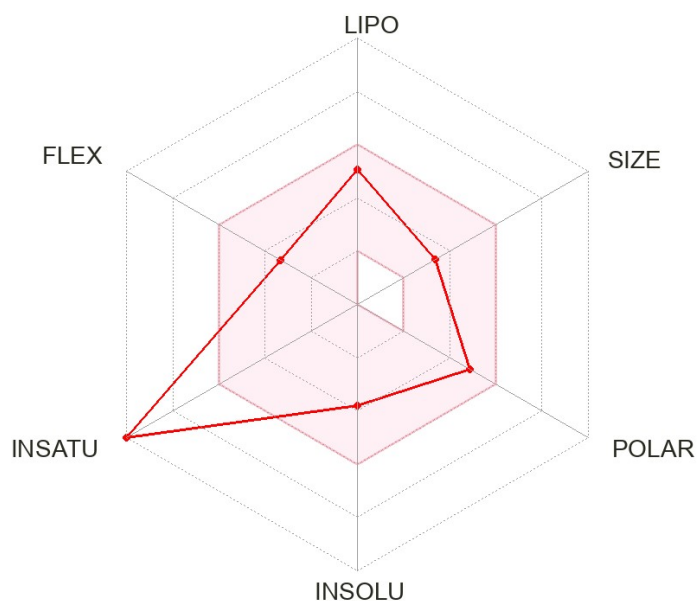

**Fig. S6** The bioavailability of the investigated compound tested using the swissADME web application.

**Table S7** Calculated drug-likeness properties for the APCB compound.

| Calculated drug-likeness properties for title molecule   | Value  |
|----------------------------------------------------------|--------|
| Lipinski's violations                                    | 0      |
| Hydrogen Bond Donor (HBD)                                | 3      |
| Hydrogen Bond Acceptor (HBA)                             | 1      |
| Topological polar surface area (TPSA) [ $\text{\AA}^2$ ] | 99.24  |
| Number of atoms                                          | 32     |
| Number of rotatable bonds (NROTB)                        | 5      |
| Molecular weight (MW)                                    | 271.34 |
| Consensus Log Po/w (clogP)                               | 2.48   |
| Bioavailability score                                    | 0.55   |

## **2. *The procedure of calculation for reduced density gradient***

1. Generate Gaussian file.
2. Copy and paste Multiwfn in the target file with the Gaussian file.
3. Open Multiwfn and press enter to select the file.
4. Select 20 representing Visual study of weak interactions.
5. Select 1 NCI analysis(also known as RDG analysis)
6. Select 3 High-quality grids.
7. Select -7 to show the isosurface of RDG.
8. After selecting a suitable isovalue, press -1 to draw a scatter graph.
9. The RDG will be shown in a non-colored manner.
10. To illustrate NCI within the molecule, copy and paste the VMD file into the desired file.
11. From the original Multiwfn software file, copy RDGfill.VMD from examples to the desired file.
12. Open VMD and write source RDGfill.VMD.
13. The interaction is observed in a new window.

### **3.1. *MTT assay against MCF-7 cells***

**3.1.1. Mammalian cell lines:** MCF-7 cells (human breast cancer cell line), were obtained from the American Type Culture Collection (ATCC, Rockville, MD).

**3.1.2. Chemicals Used:** Dimethyl sulfoxide (DMSO), MTT and trypan blue dye were purchased from Sigma (St. Louis, Mo., USA).

Fetal Bovine serum, RPMI-1640, HEPES buffer solution, L-glutamine, gentamycin and 0.25% Trypsin-EDTA were purchased from Lonza (Belgium).

### **3.1.3. Cell line Propagation:**

The cells were grown on RPMI-1640 medium supplemented with 10% inactivated fetal calf serum and 50µg/ml gentamycin. The cells were maintained at 37°C in a humidified atmosphere with 5% CO<sub>2</sub> and were subcultured two to three times a week.

### **3.1.4. Cytotoxicity evaluation using viability assay**

For antitumor assays, the tumor cell lines were suspended in medium at concentration 5x10<sup>4</sup> cell/well in Corning® 96-well tissue culture plates, then incubated for 24 hr. The tested

compounds were then added into 96-well plates (three replicates) to achieve twelve concentrations for each compound. Six vehicle controls with media or 0.5 % DMSO were run for each 96 well plate as a control. After incubating for 24 h, the numbers of viable cells were determined by the MTT test. Briefly, the media was removed from the 96 well plate and replaced with 100  $\mu$ l of fresh culture RPMI 1640 medium without phenol red then 10  $\mu$ l of the 12 mM MTT stock solution (5 mg of MTT in 1 mL of PBS) to each well including the untreated controls. The 96 well plates were then incubated at 37°C and 5% CO<sub>2</sub> for 4 hours. An 85  $\mu$ l aliquot of the media was removed from the wells, and 50  $\mu$ l of DMSO was added to each well and mixed thoroughly with the pipette and incubated at 37°C for 10 min. Then, the optical density was measured at 590 nm with the microplate reader (SunRise, TECAN, Inc, USA) to determine the number of viable cells and the percentage of viability was calculated as  $[(OD_t/OD_c)] \times 100\%$  where OD<sub>t</sub> is the mean optical density of wells treated with the tested sample and OD<sub>c</sub> is the mean optical density of untreated cells. The relation between surviving cells and drug concentration is plotted to get the survival curve of each tumor cell line after treatment with the specified compound. The 50% inhibitory concentration (IC<sub>50</sub>), the concentration required to cause toxic effects in 50% of intact cells, was estimated from graphic plots of the dose response curve for each conc. using Graphpad Prism software (San Diego, CA. USA).

### **3.2. *MTT assay against MRC-5 cells.***

#### **3.2.1. Mammalian cell lines: MRC-5**

(Normal human Lung fibroblast cells), were obtained from the American Type Culture Collection (ATCC, Rockville, MD).

#### **3.2.2. Chemicals Used**

Dimethyl sulfoxide (DMSO), MTT and trypan blue dye were purchased from Sigma (St. Louis, Mo., USA). Fetal Bovine serum, DMEM, HEPES buffer solution, L-glutamine, gentamycin and 0.25% Trypsin-EDTA were purchased from Lonza (Belgium).

#### **3.2.3. Cell line Propagation**

The cells were propagated in Dulbecco's modified Eagle's medium (DMEM) supplemented with 10% heat-inactivated fetal bovine serum, 1% L-glutamine, HEPES buffer and 50µg/ml gentamycin. All cells were maintained at 37°C in a humidified atmosphere with 5% CO<sub>2</sub> and were subcultured two times a week.

#### **3.2.4. Cytotoxicity evaluation using viability assay**

For cytotoxicity assay, the cells were seeded in 96-well plate at a cell concentration of  $1 \times 10^4$  cells per well in 100µl of growth medium. Fresh medium containing different concentrations of the test sample was added after 24 h of seeding. Serial two-fold dilutions of the tested chemical compound were added to confluent cell monolayers dispensed into 96-well, flat-bottomed microtiter plates (Falcon, NJ, USA) using a multichannel pipette. The microtiter plates were incubated at 37°C in a humidified incubator with 5% CO<sub>2</sub> for a period of 24 h. Three wells were used for each concentration of the test sample. Control cells were incubated without test sample and with or without DMSO. The little percentage of DMSO present in the wells (maximal 0.1%) was found not to affect the experiment. After incubation of the cells viable cells yield was determined by a colorimetric method.

After incubating for 24 h, the numbers of viable cells were determined by the MTT test. Briefly, the media was removed from the 96 well plate and replaced with 100 µl of fresh culture RPMI 1640 medium without phenol red then 10 µl of the 12 mM MTT stock solution (5 mg of MTT in 1 mL of PBS) to each well including the untreated controls. The 96 well plates were then incubated at 37°C and 5% CO<sub>2</sub> for 4 hours. An 85 µl aliquot of the media was removed from the wells, and 50 µl of DMSO was added to each well and mixed thoroughly with the pipette and incubated at 37°C for 10 min. Then, the optical density was measured at 590 nm with the microplate reader (SunRise, TECAN, Inc, USA) to determine the number of viable cells and the percentage of viability was calculated as  $[(OD_t/OD_c)] \times 100\%$  where OD<sub>t</sub> is the mean optical density of wells treated with the tested sample and OD<sub>c</sub> is the mean optical density of untreated cells.

The relation between surviving cells and drug concentration is plotted to get the survival curve of each tumor cell line after treatment with the specified compound. The Cytotoxic concentration (CC<sub>50</sub>), the concentration required to cause toxic effects in 50% of intact cells, was estimated from

graphic plots of the dose response curve for each conc. using Graphpad Prism software (San Diego, CA. USA).

### 3.3. *VEGFR-2 kinase inhibitory activity assay*

The most active compound was evaluated for in vitro VEGFR-2 kinase inhibitory activity by VEGFR2 (KDR) Kinase Assay Kit-BPS Bioscience Corporation catalog # 40325, using Kinase-Glo® MAX as a detection reagent following the manufacturer's instructions as following:

- Thaw 5x Kinase Buffer 1, ATP and PTK substrate Poly (Glu:Tyr 4:1) (10 mg/ml).
- Prepare the master mixture (25 µl per well): N wells x (6 µl 5x Kinase Buffer 1 + 1 µl ATP (500 µM) + 1 µl PTK substrate Poly (Glu:Tyr 4:1) (10 mg/ml)+ 17 µl water). Add 25 µl to every well.
- Add 5 µl of Inhibitor solution of each well labeled as "Test Inhibitor". For the "Positive Control" and "Blank", add 5 µl of the same solution without inhibitor (Inhibitor buffer).
- Prepare 3 ml of 1x Kinase Buffer 1 by mixing 600 µl of 5x Kinase Buffer 1 with 2400 µl water. 3 ml of 1x Kinase Buffer 1 is sufficient for 100 reactions.
- To the wells designated as "Blank", add 20 µl of 1x Kinase Buffer 1.
- Thaw VEGFR2 enzyme on ice. Upon first thaw, briefly spin tube containing enzyme to recover full content of the tube. Calculate the amount of VEGFR2 required for the assay and dilute enzyme to 1 ng/µl with 1x Kinase Buffer 1.
- Initiate reaction by adding 20 µl of diluted VEGFR2 enzyme to the wells designated "Positive Control" and "Test Inhibitor Control". Incubate at 30°C for 45 minutes.
- Thaw Kinase-Glo Max reagent.
- After the 45 minutes, add 50 µl of Kinase-Glo Max reagent to each well. Cover plate with aluminum foil and incubate the plate at room temperature for 15 minutes.
- Measure luminescence using the microplate reader.



- Inhibitory activity was expressed as IC<sub>50</sub> values (the concentration at which 50 % of the enzyme activity inhibited), which were calculated from dose-response curves obtained using twelve tested concentrations of the inhibitor and carried out in duplicate as shown below:

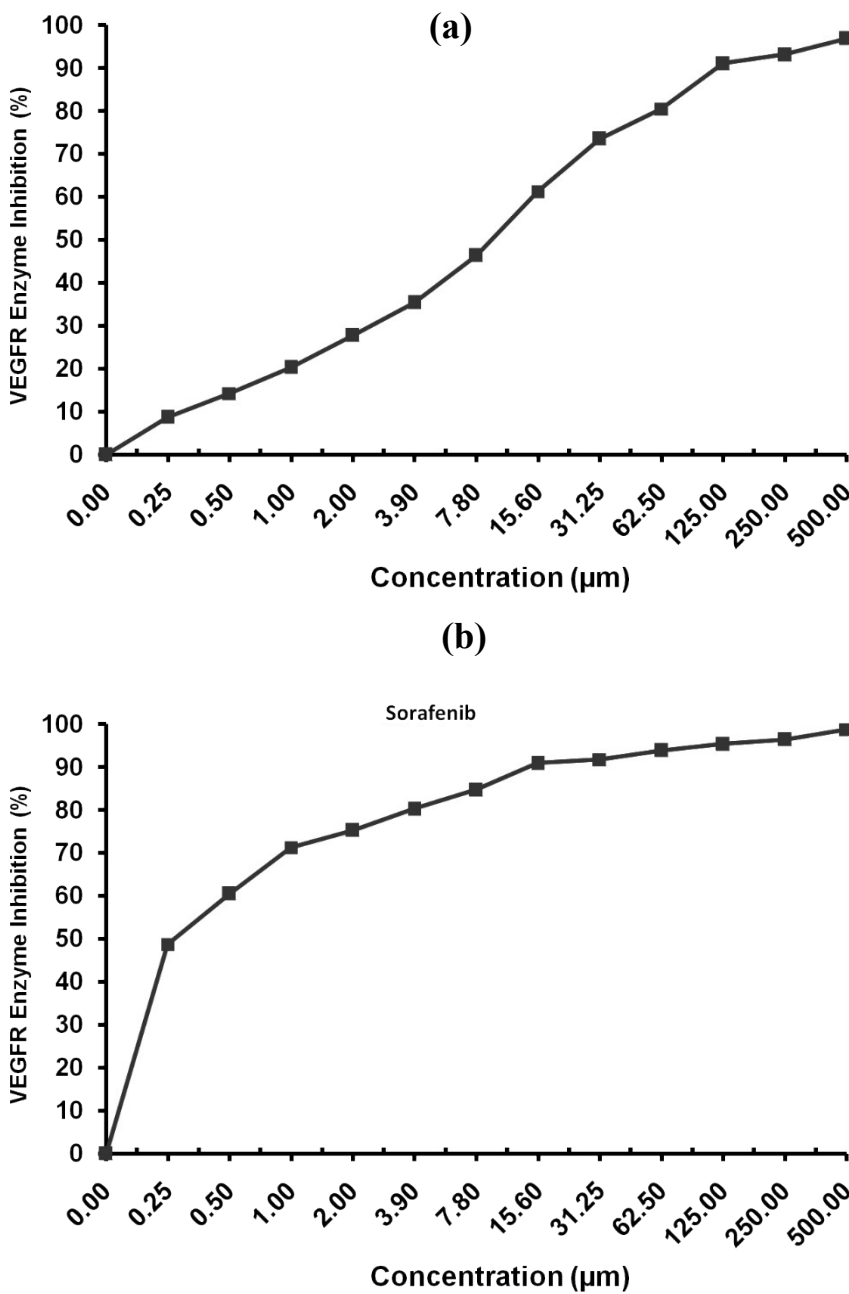

**Fig. S7** Relation between VEGFR-2 enzyme inhibition as a function of concentration for (a) head molecule. (b) sorafenib.

**Table S8** Inhibition of VEGFR-2 Enzyme in the presence of various concentrations of APCB.

| Sample conc. ( $\mu\text{m}$ ) | % of VEGFR Enzyme Activity | VEGFR Enzyme Inhibition (%) | S.D. ( $\pm$ ) |
|--------------------------------|----------------------------|-----------------------------|----------------|
| 500                            | 3.11                       | 96.89                       | 0.27           |
| 250                            | 6.86                       | 93.14                       | 0.38           |
| 125                            | 8.92                       | 91.08                       | 0.74           |
| 62.5                           | 19.53                      | 80.47                       | 0.91           |
| 31.25                          | 26.48                      | 73.52                       | 1.46           |
| 15.6                           | 38.72                      | 61.28                       | 0.94           |
| 7.8                            | 53.63                      | 46.37                       | 1.05           |
| 3.9                            | 64.59                      | 35.41                       | 0.63           |
| 2                              | 72.18                      | 27.82                       | 0.44           |
| 1                              | 79.61                      | 20.39                       | 0.23           |
| 0.5                            | 85.75                      | 14.25                       | 0.17           |
| 0.25                           | 91.27                      | 8.73                        | 0.09           |
| 0                              | 100                        | 0                           |                |

**Table S9** Inhibition of VEGFR-2 Enzyme in the presence of various concentrations of sorafenib.

| Sample conc. ( $\mu\text{g/ml}$ ) | % of VEGFR Enzyme Activity | VEGFR Enzyme Inhibition (%) | S.D. ( $\pm$ ) |
|-----------------------------------|----------------------------|-----------------------------|----------------|
| 500                               | 1.24                       | 98.76                       | 0.32           |
| 250                               | 3.58                       | 96.42                       | 0.46           |
| 125                               | 4.63                       | 95.37                       | 0.21           |
| 62.5                              | 6.11                       | 93.89                       | 0.53           |
| 31.25                             | 8.24                       | 91.76                       | 0.28           |
| 15.6                              | 9.07                       | 90.93                       | 0.11           |
| 7.8                               | 15.28                      | 84.72                       | 0.06           |
| 3.9                               | 19.71                      | 80.29                       | 0.37           |
| 2                                 | 24.66                      | 75.34                       | 0.28           |
| 1                                 | 28.71                      | 71.29                       | 0.65           |
| 0.5                               | 39.47                      | 60.53                       | 1.29           |
| 0.25                              | 51.29                      | 48.71                       | 0.83           |
| 0                                 | 100                        | 0                           |                |

**Table S10** Comparison of IC<sub>50</sub> of the investigated compound to other recently published thiourea derivative and reference compound.

| Compound                                                                            | IC <sub>50</sub>                    | reference compound. |
|-------------------------------------------------------------------------------------|-------------------------------------|---------------------|
| 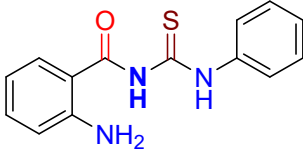   | (investigated compound)<br>35.78 μM |                     |
|    | >5000 nM                            |                     |
|   | 4.1 μM                              |                     |
|  | >10000 nM                           |                     |
|  | 100.00 nM                           |                     |
|  | 4.92 nM                             |                     |
